# Supplementary material for: A nanofluidic device for rapid and multiplexed SARS-CoV-2 serological antibody detection
Source: Research Square preprint supplement (doi:10.21203/rs.3.rs-537056/v1), 2021-05-18
Supplement: Supplementary file 1 [file 3603748f357871270cd9db1c.docx]

**Supplementary Table 1. | The nominal particle diameter compared to the calculated diameter according to the linear regression curve of the 3D nanofluidic device**. The associated coefficient of variation for both mean particle diameters is given between brackets. N.A. signifies missing supplier information.

| **Nominal diameter** | 3,16  (3%) | 2,12  (1%) | 1,74  (1%) | 1,03  (1%) | 0,9  (N.A.) |
| --- | --- | --- | --- | --- | --- |
| **Calculated diameter** | 3,16 (1,8%) | 2,15 (2,7%) | 1,67 (4,6%) | 1,06 (4,4%) | 0,9 (3,9%) |
